# Supplementary material
Source: PubMed Central journal article supplement (PMC3169082)
Supplement: NIHMS314712-supplement-1_si_001.pdf [file NIHMS314712-supplement-1_si_001.pdf]

# The Amination Reaction on Copper(III) and Germanium(IV) $\beta$ -Nitrocorrolates

## Supporting information

*Manuela Stefanelli,<sup>1</sup> Federica Mandoj,<sup>1</sup> Marco Mastroianni,<sup>1</sup> Sara Nardis,<sup>1</sup> Pruthviray*

*Mohite,<sup>1</sup> Frank R. Fronczek,<sup>2</sup> Kevin M. Smith,<sup>2\*</sup> Karl M. Kadish,<sup>3\*</sup> Xiao Xiao,<sup>3</sup>*

*Zhongping Ou<sup>3</sup> and Roberto Paolesse<sup>1\*</sup>*

1) Dipartimento di Scienze e Tecnologie Chimiche, Università di Roma Tor Vergata, via della Ricerca Scientifica, 1, 00133 Rome, Italy

2) Department of Chemistry, Louisiana State University, Baton Rouge, Louisiana 70803 USA

3) Department of Chemistry, University of Houston, Houston, Texas 77204-5003 USA

[roberto.paolesse@uniroma2.it](mailto:roberto.paolesse@uniroma2.it); [kkadish@uh.edu](mailto:kkadish@uh.edu); [kmsmith@lsu.edu](mailto:kmsmith@lsu.edu)

**RECEIVED DATE (to be automatically inserted after your manuscript is accepted if required according to the journal that you are submitting your paper to)**

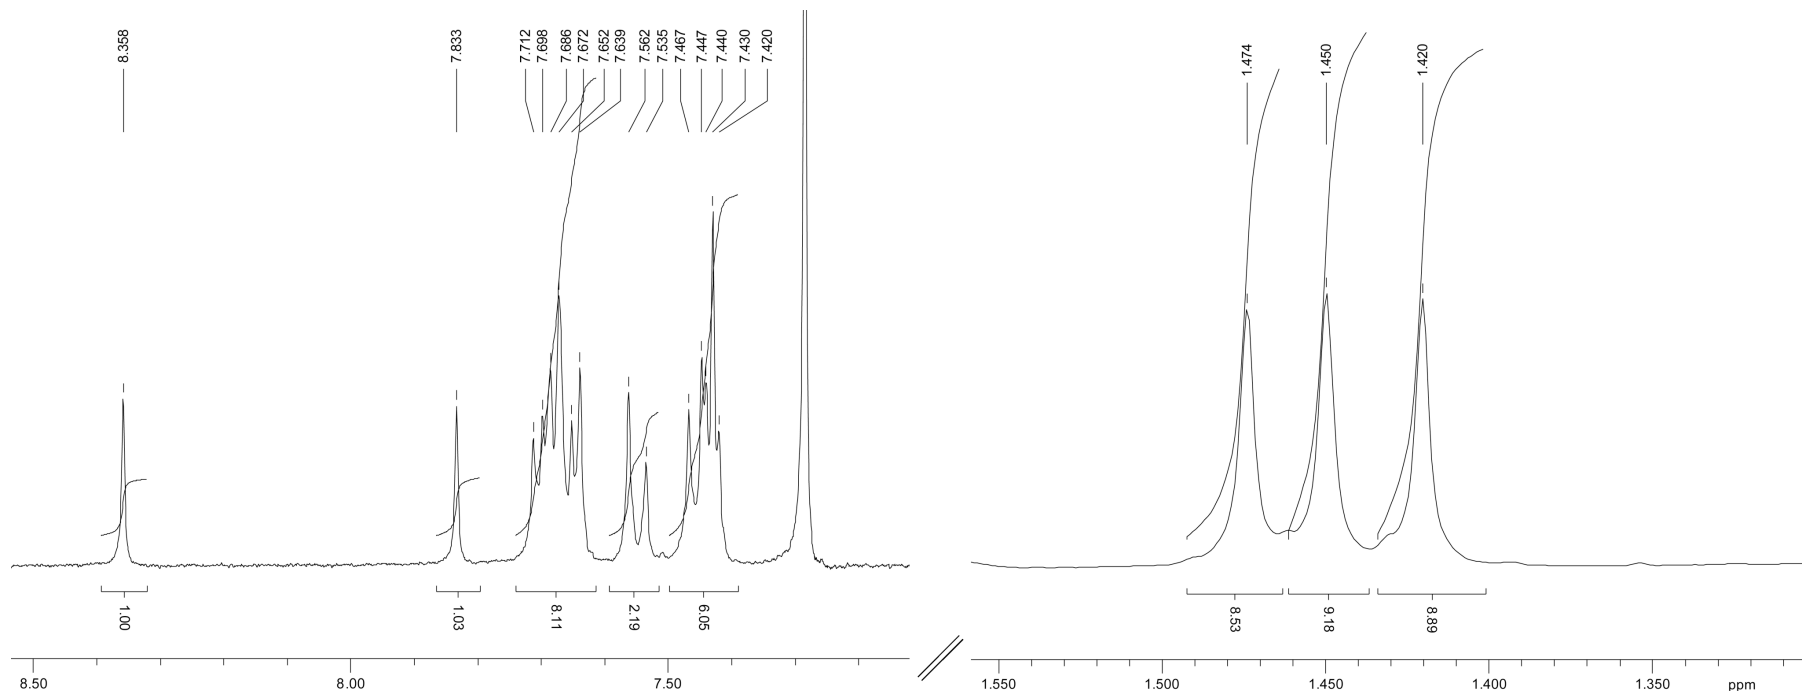

**Figure S1.**  $^1\text{H}$  NMR spectrum of 2,17-( $\text{NO}_2$ ) $_2$ TtBuPCorrCu in  $\text{CDCl}_3$ .

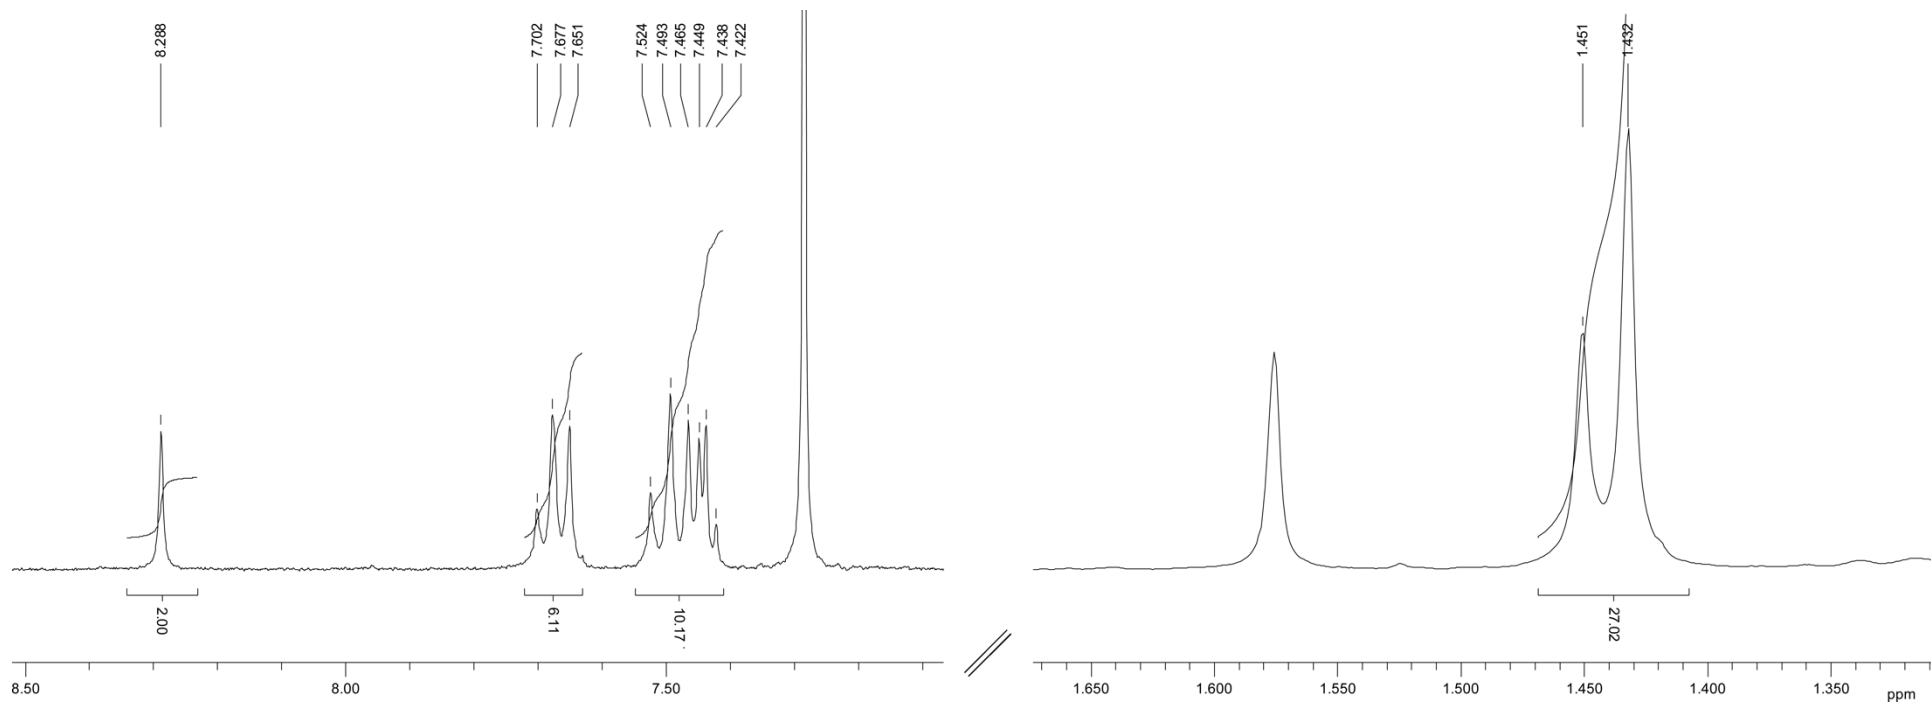

**Figure S2.**  $^1\text{H}$  NMR spectrum of 3,17-(NO<sub>2</sub>)<sub>2</sub>TtBuPCorrCu in CDCl<sub>3</sub>.

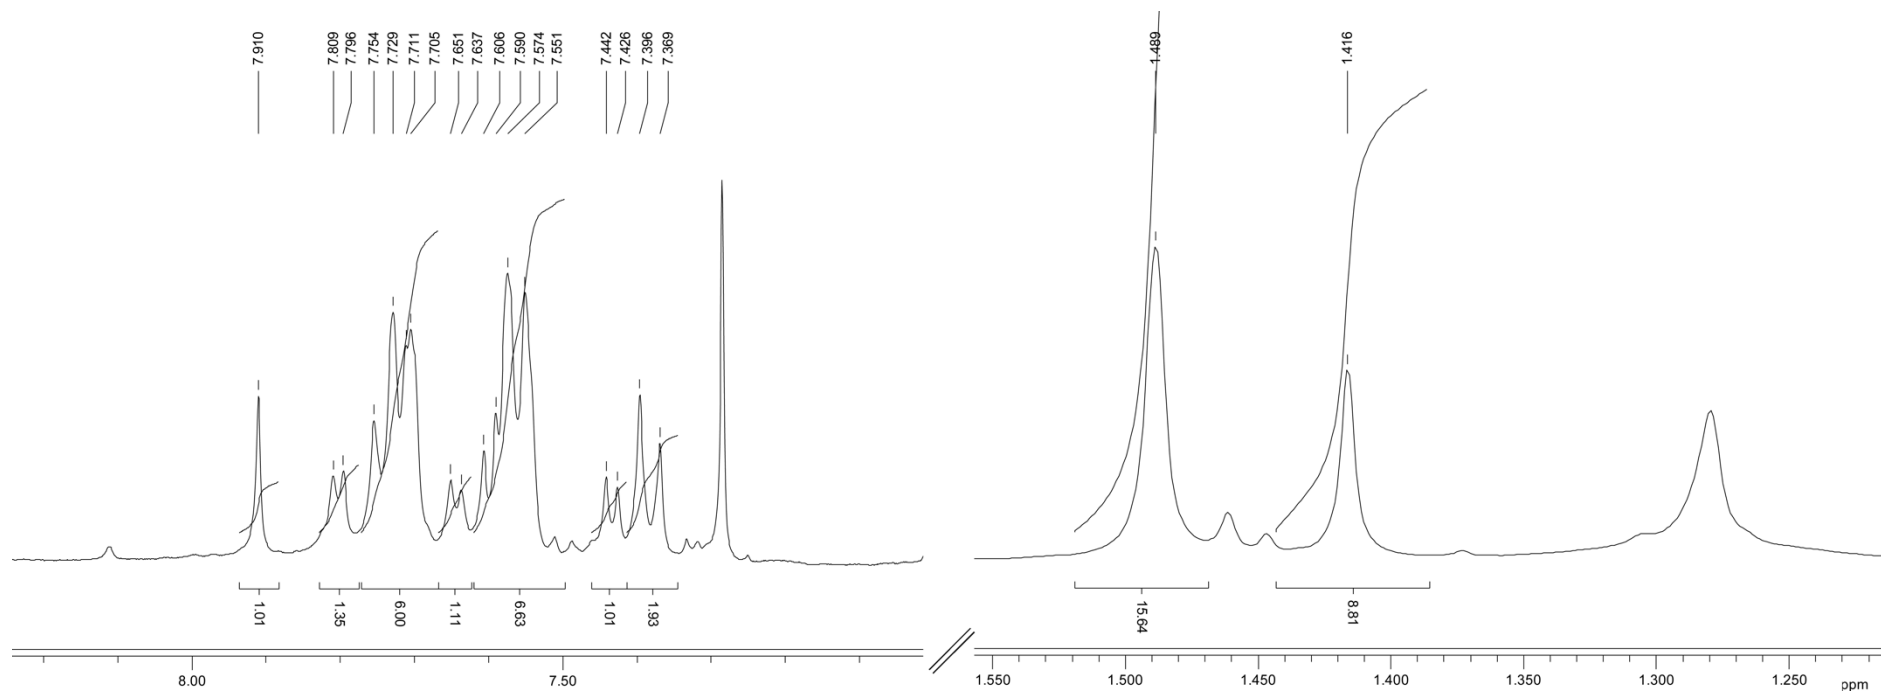

**Figure S3.** <sup>1</sup>H NMR spectrum of 2-(NO<sub>2</sub>)TiBuPCorrCu in CDCl<sub>3</sub>.

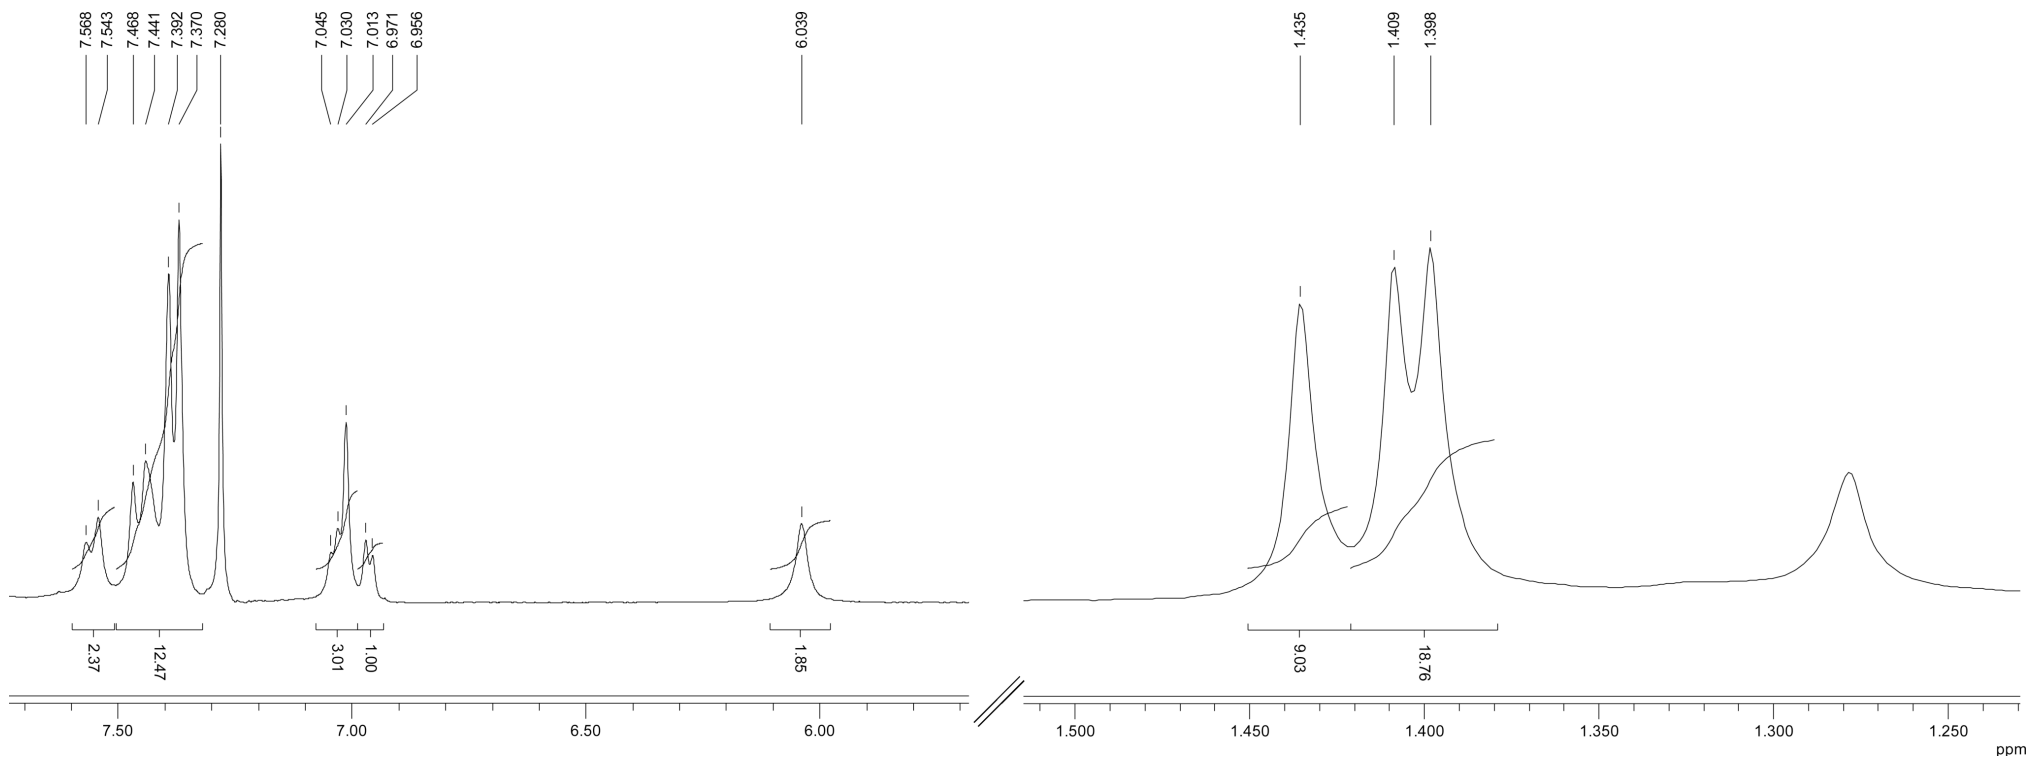

**Figure S4.**  $^1\text{H}$  NMR spectrum of 2-NH<sub>2</sub>-3-(NO<sub>2</sub>)TtBuPCorrCu in CDCl<sub>3</sub>

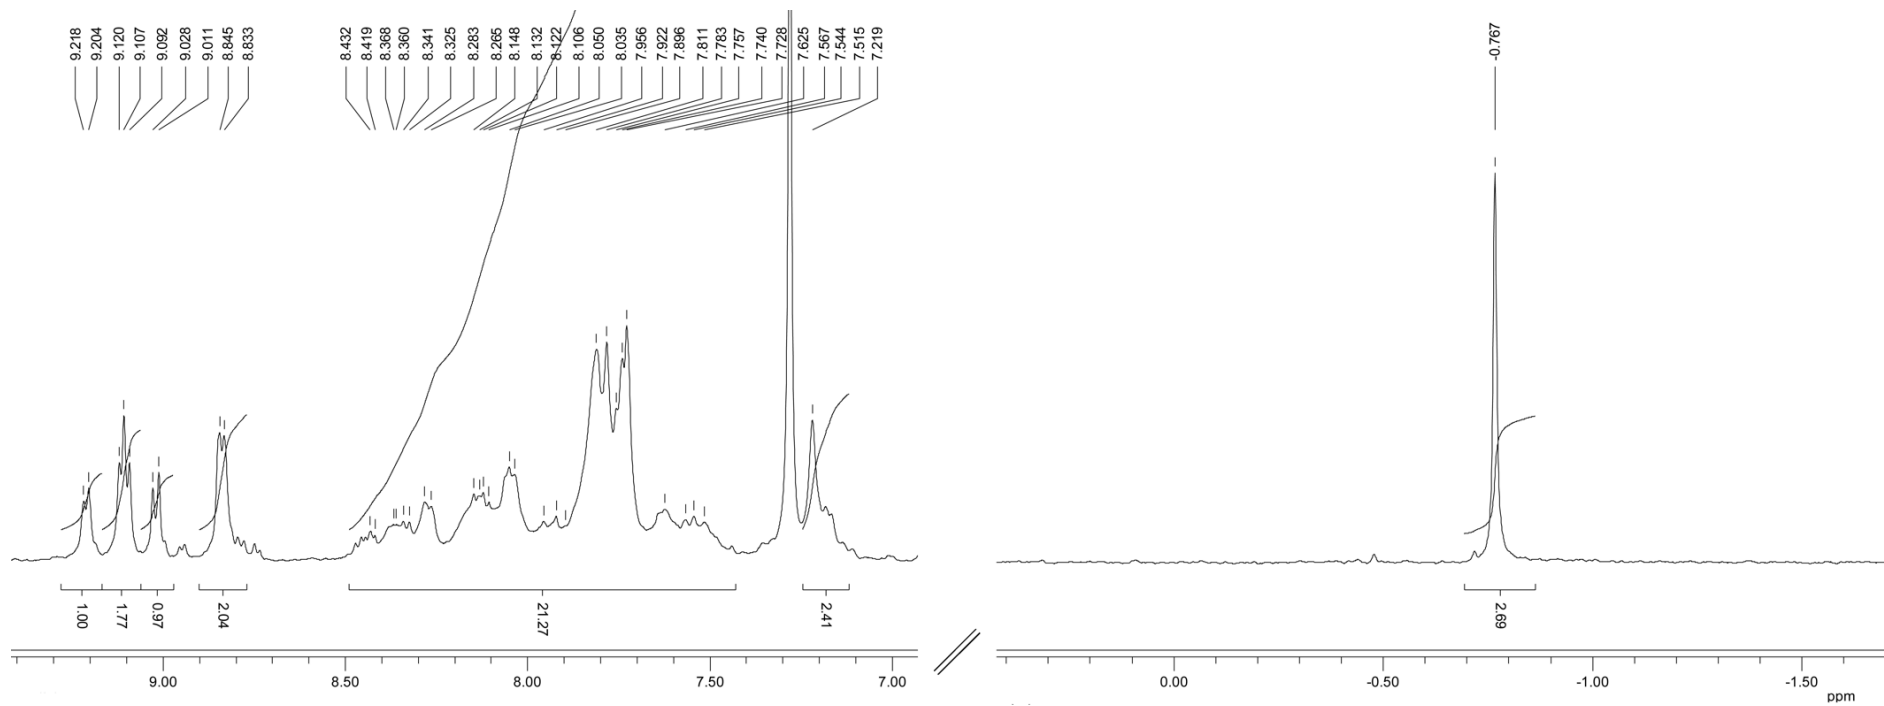

**Figure S5.**  $^1\text{H}$  NMR spectrum of 2-NH<sub>2</sub>-3-(NO<sub>2</sub>)<sub>2</sub>TPCorrGe(OCH<sub>3</sub>) in CDCl<sub>3</sub>.

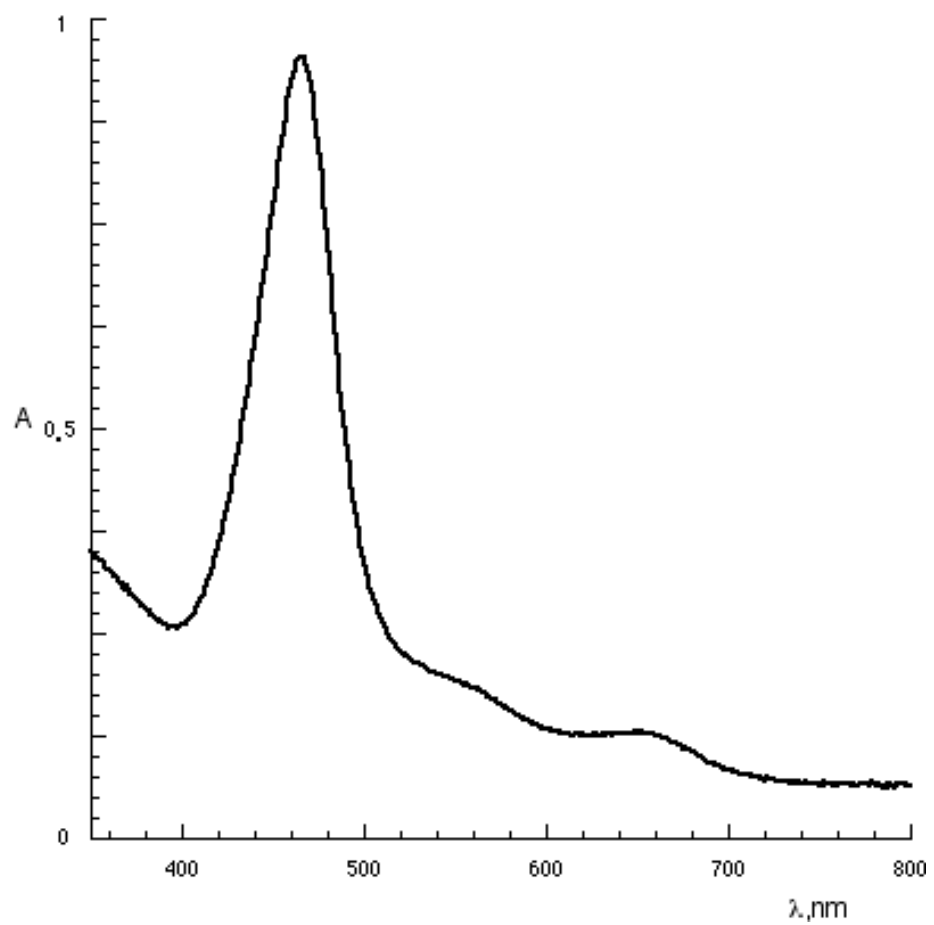

**Figure S6.** UV-vis spectrum of 2,17-(NO<sub>2</sub>)<sub>2</sub>TtBuPCorrCu in CHCl<sub>3</sub>.

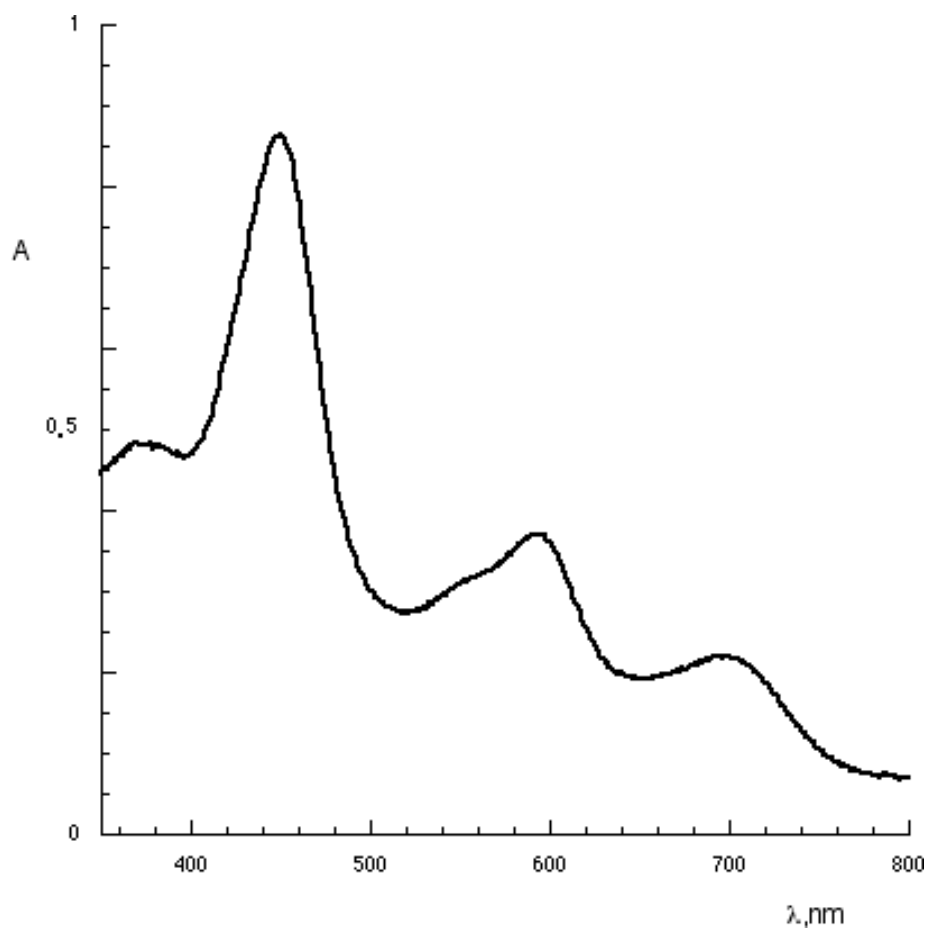

**Figure S7.** UV-vis spectrum of 3,17-(NO<sub>2</sub>)<sub>2</sub>TtBuPCorrCu in CHCl<sub>3</sub>.



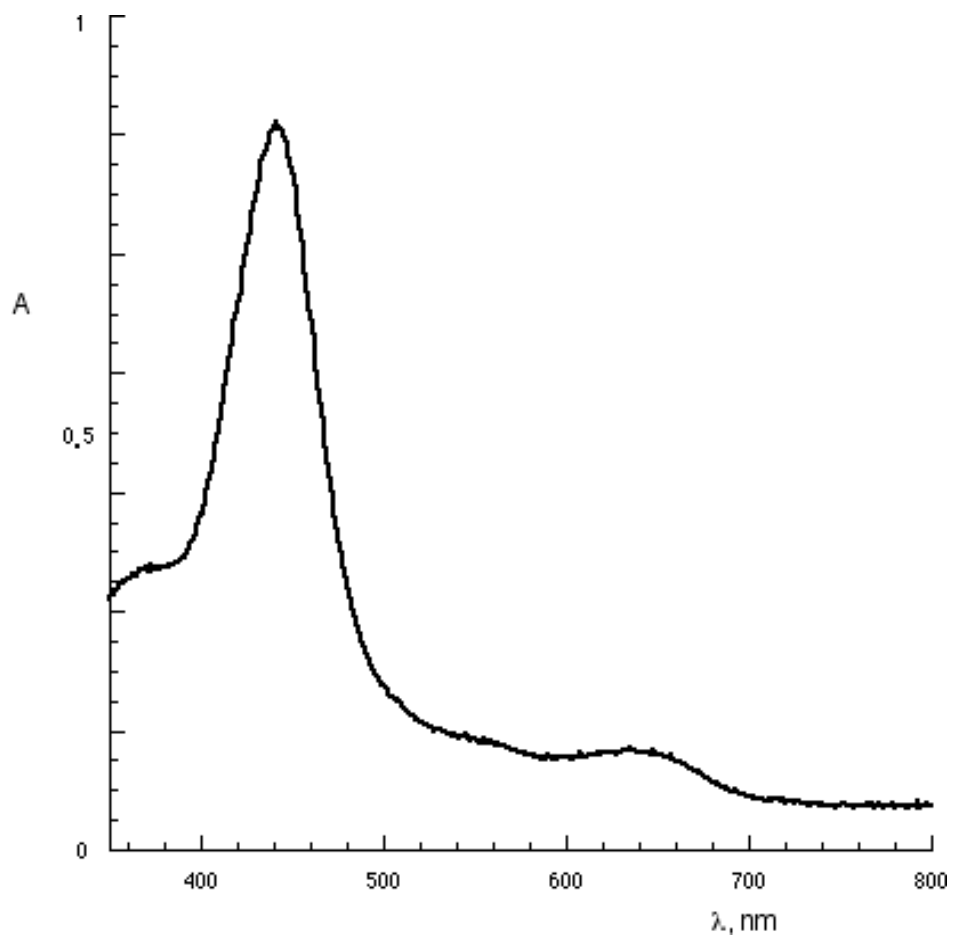

**Figure S8.** UV-vis spectrum of 2-(NO<sub>2</sub>)-TtBuPCorrCu in CHCl<sub>3</sub>.

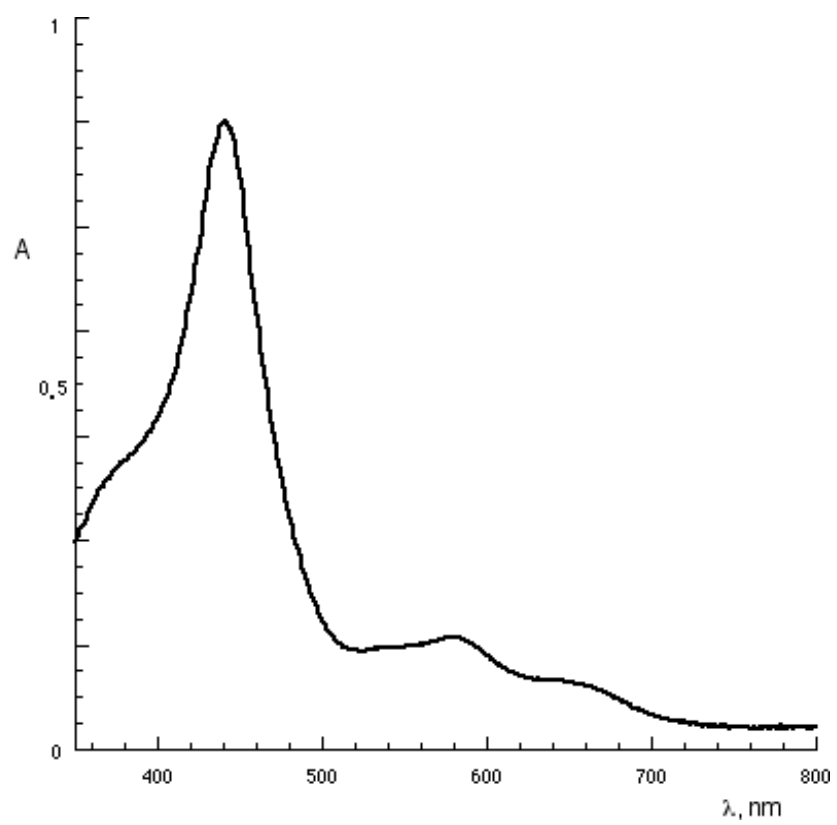

**Figure S9.** UV-vis spectrum of 2-NH<sub>2</sub>-3-NO<sub>2</sub>TtBuPCorrCu in CHCl<sub>3</sub>.

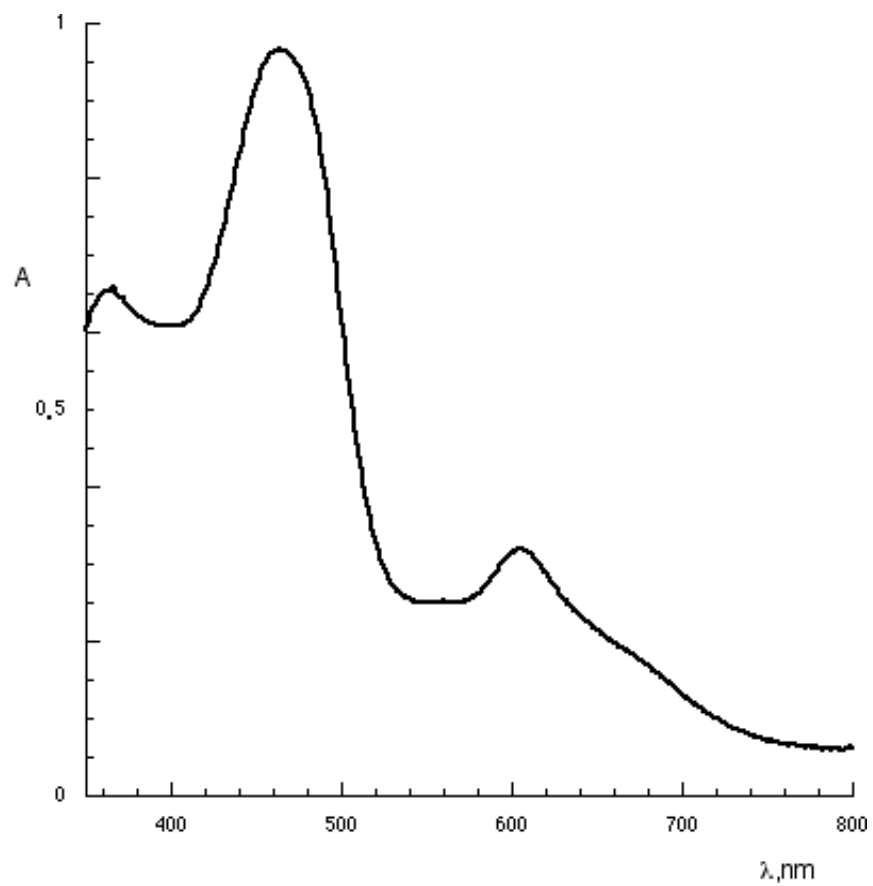

**Figure S10.** UV-vis spectrum of 2,18-(NH<sub>2</sub>)<sub>2</sub>-3,17-(NO<sub>2</sub>)TtBuPCorrCu in CHCl<sub>3</sub>.

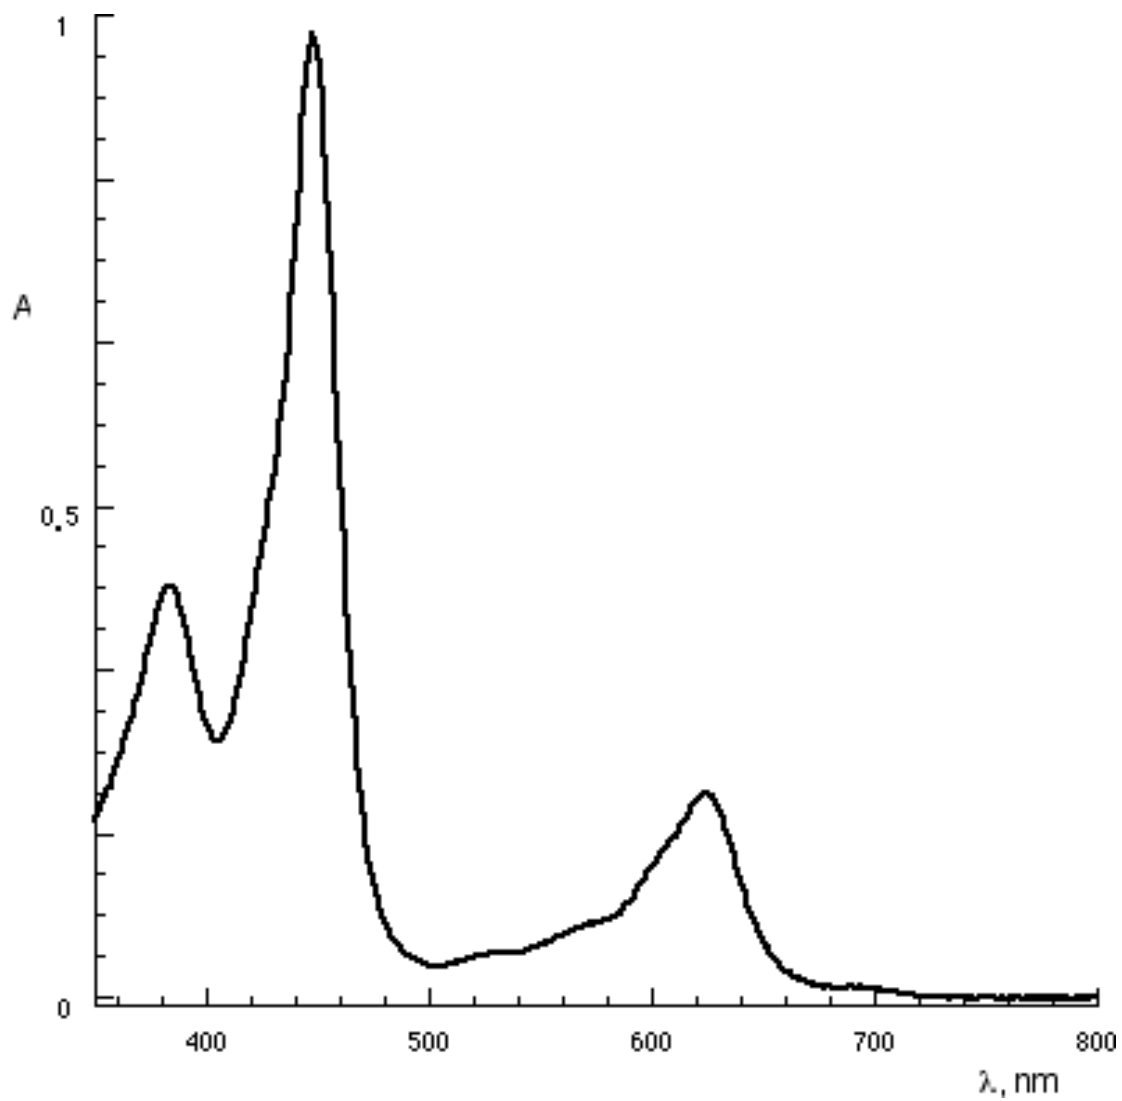

**Figure S11.** UV-vis spectrum of 2-NH<sub>2</sub>-3-NO<sub>2</sub>-TPCorrGe(OCH<sub>3</sub>) in CHCl<sub>3</sub>.

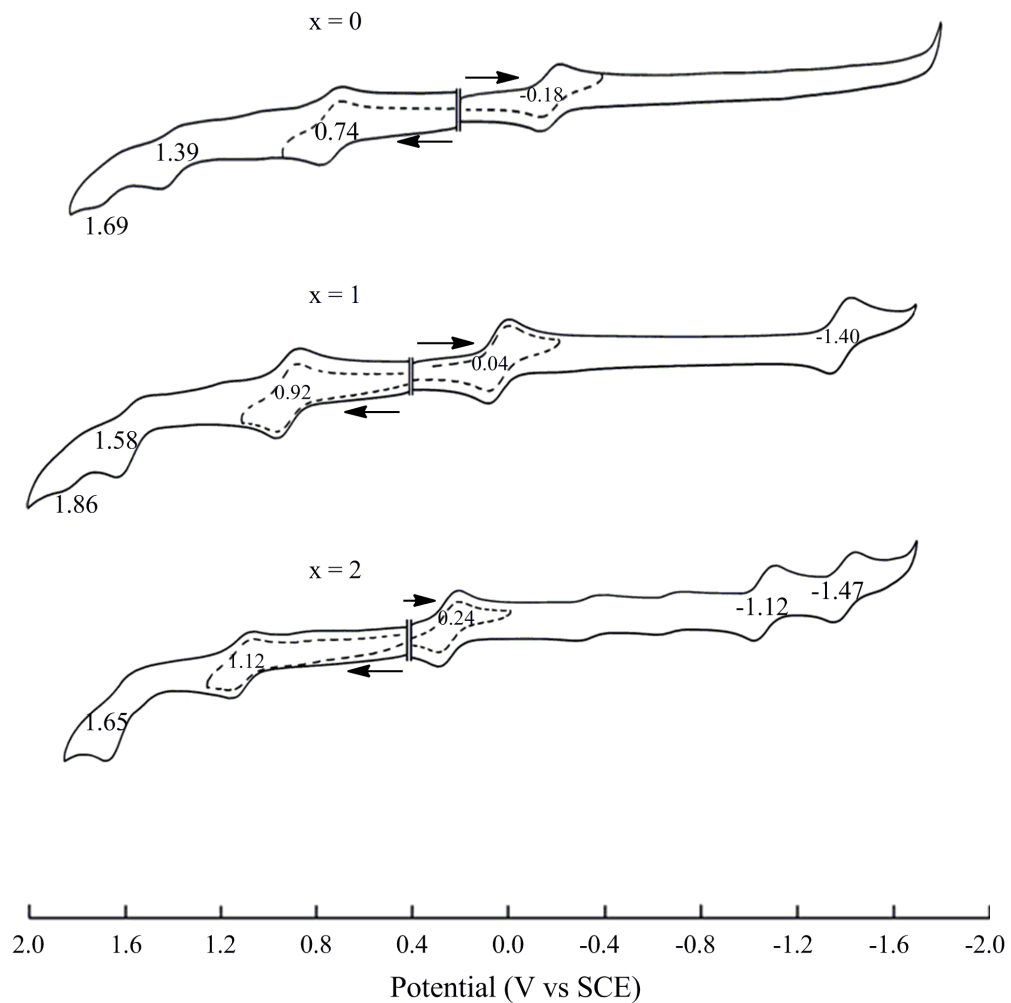

**Figure S12.** Cyclic voltammograms of  $(\text{NO}_2)_x\text{TtBuPCorrCu}$  in PhCN, 0.1 M TBAP.

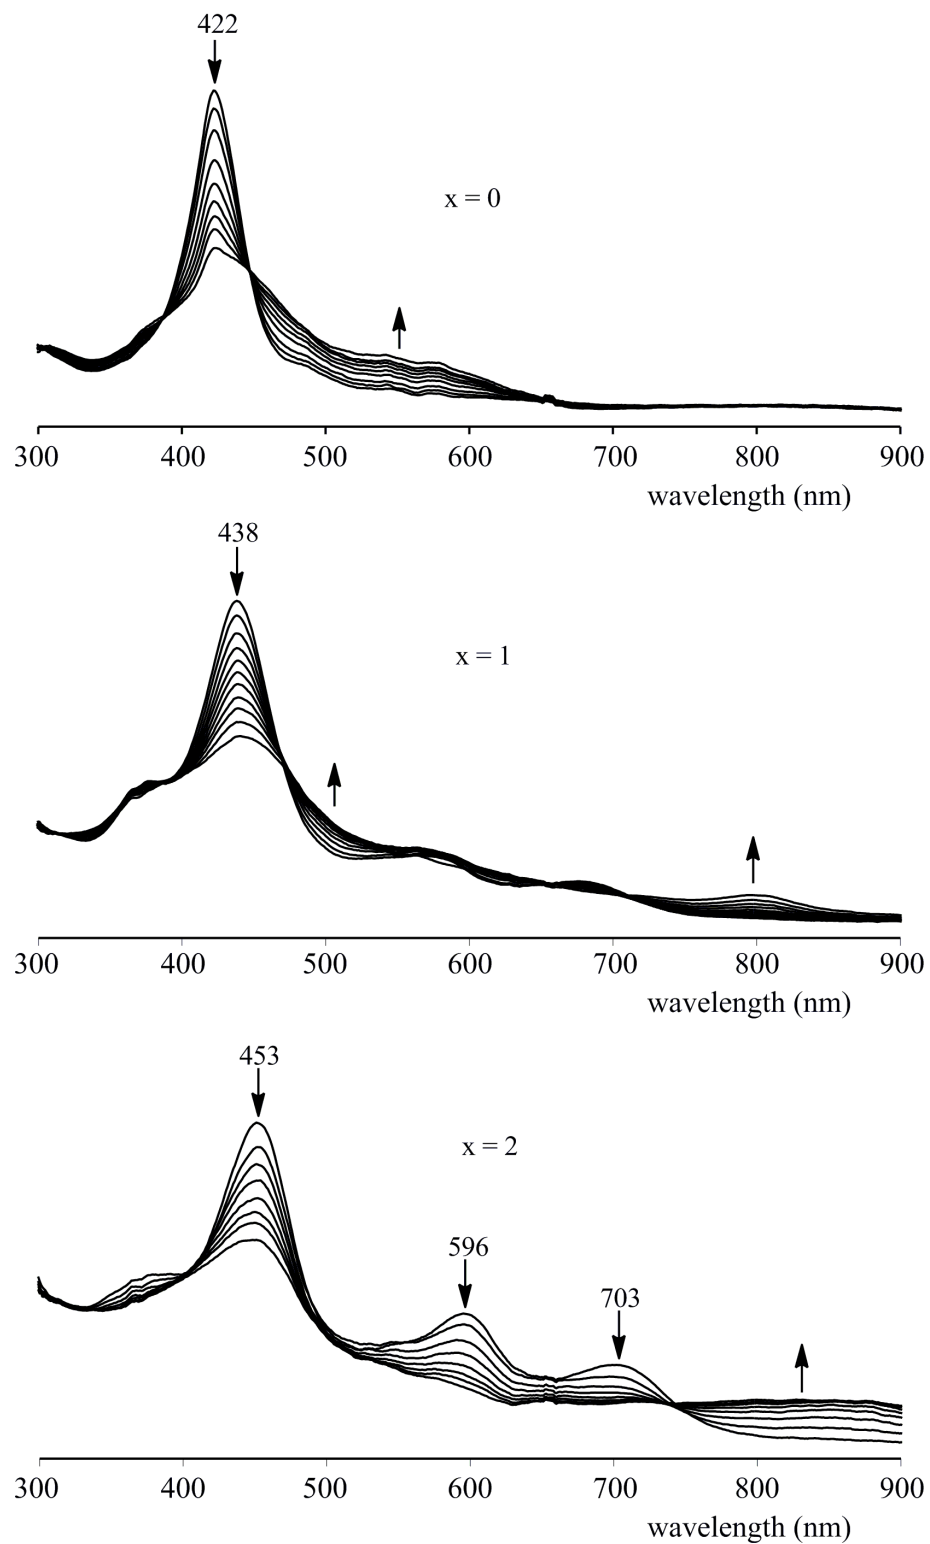

**Figure S13.** Spectra changes during 1st oxidation of  $(\text{NO}_2)_x\text{TtBuPCorrCu}$  in  $\text{PhCN}$ ,  $0.1 \text{ M TBAP}$ .
